# Supplementary material for: Data-driven support vector regression-based hybrid models for prediction of syngas production in the gasification process of biomass
Source: publisher site journal article supplement (doi:10.1515/cppm-2025-0016), 2025-05-28
Supplement: Supplementary file 1 [file j_cppm-2025-0016_suppl_001.docx]

| **Inputs** | | | | | | | | | | | | | | | | | | **Outputs** | |
| --- | --- | --- | --- | --- | --- | --- | --- | --- | --- | --- | --- | --- | --- | --- | --- | --- | --- | --- | --- |
|  | | Ultimate Analysis | | | | | Proximate Analysis | | | | Lignocellulosic Composition | | | Gasifier Conditions and Information | | | | Gas Composition | |
| Particle size [mm] | LHV [MJ/kg wb] | C [%daf] | H [%daf] | N [%daf] | S [%daf] | O [%daf] | Ash [%db] | Moisture [%wb] | Volatile Matter [%db] | Fixed carbon [%db] | Cellulose [%db] | Hemicellulose [%db] | Lignin [%db] | Temperature [°C] | Residence time [min] | Steam/Biomass [wt/wt] | ER | N2 [vol.% db] | H2 [vol.% db] |
| 1.5 | 14.47 | 46.29 | 6.48 | 1.04 | 0.12 | 46.08 | 1.56 | 11.89 | 75.78 | 14.77 | 37.53 | 19.33 | 24.00 | 920.00 | 156.00 | 1.20 | 0.31 | 50.49 | 22.05 |
| 5.580500318 | 16.20 | 44.43 | 6.16 | 1.65 | 0.43 | 41.90 | 5.50 | 20.00 | 81.25 | 13.25 | 37.53 | 19.33 | 24.00 | 850.00 | 156.00 | 1.28 | 0.30 | 51.50 | 12.25 |
| 5 | 20.29 | 51.81 | 5.76 | 0.26 | 0.36 | 41.81 | 5.64 | 8.52 | 79.90 | 14.46 | 39.60 | 21.60 | 23.60 | 750.00 | 52.70 | 1.16 | 0.30 | 50.22 | 17.5 |
| 11 | 20.27 | 51.06 | 6.04 | 0.14 | 0.01 | 42.70 | 0.70 | 6.60 | 82.60 | 13.10 | 44.50 | 20.60 | 27.80 | 602.00 | 283.00 | 0.75 | 0.46 | 59.70 | 57 |
| 6 | 18.50 | 49.40 | 5.90 | 0.10 | 0.48 | 44.50 | 0.33 | 8.50 | 80.98 | 18.69 | 39.60 | 21.60 | 23.60 | 780.00 | 20.00 | 0.91 | 0.29 | 47.96 | 10 |
| 0.375 | 18.98 | 50.82 | 7.12 | 0.15 | 0.57 | 41.34 | 0.55 | 8.00 | 82.29 | 17.16 | 39.25 | 20.97 | 23.60 | 800.00 | 100.00 | 1.40 | 0.22 | 56.87 | 9.5 |
| 4 | 15.73 | 44.96 | 5.83 | 3.10 | 0.61 | 45.50 | 0.47 | 14.60 | 89.11 | 10.42 | 39.25 | 20.97 | 23.60 | 1050.00 | 100.00 | 1.98 | 0.25 | 46.70 | 27.1 |
| 4.779357188 | 14.22 | 47.00 | 6.78 | 0.48 | 0.04 | 45.70 | 20.00 | 9.08 | 66.40 | 13.60 | 39.60 | 21.60 | 23.60 | 822.00 | 280.58 | 0.75 | 0.35 | 64.11 | 15.5 |
| 1.25 | 19.30 | 49.20 | 6.12 | 0.10 | 0.01 | 44.58 | 0.40 | 7.00 | 75.15 | 15.03 | 39.60 | 21.60 | 23.60 | 750.00 | 50.00 | 0.54 | 0.25 | 50.22 | 15.3 |
| 10 | 13.86 | 50.94 | 6.18 | 0.13 | 0.54 | 42.20 | 1.59 | 24.40 | 86.63 | 11.90 | 39.25 | 20.97 | 23.60 | 770.00 | 96.50 | 0.75 | 0.38 | 60.21 | 7.9 |
| 4.948485751 | 14.83 | 49.07 | 3.79 | 0.63 | 0.09 | 46.42 | 21.68 | 9.95 | 61.68 | 16.65 | 39.60 | 21.60 | 23.60 | 750.00 | 280.58 | 0.50 | 0.35 | 55.10 | 13.27 |
| 5 | 20.29 | 51.81 | 5.76 | 0.26 | 0.36 | 41.81 | 5.64 | 8.52 | 79.90 | 14.46 | 39.60 | 21.60 | 23.60 | 900.00 | 52.70 | 0.73 | 0.30 | 50.22 | 16 |
| 3.5 | 11.50 | 48.75 | 8.57 | 7.32 | 1.61 | 33.75 | 44.00 | 6.95 | 56.00 | 13.93 | 39.25 | 20.97 | 23.60 | 800.00 | 80.00 | 0.50 | 0.30 | 59.20 | 25.5 |
| 25 | 15.23 | 50.11 | 5.90 | 2.88 | 0.30 | 40.88 | 16.98 | 8.73 | 81.52 | 13.10 | 29.60 | 14.00 | 14.00 | 775.00 | 200.00 | 0.75 | 0.25 | 51.50 | 3.41 |
| 12.7 | 17.50 | 46.56 | 6.24 | 0.14 | 0.02 | 46.13 | 1.95 | 6.25 | 80.12 | 17.93 | 39.60 | 21.60 | 23.60 | 800.00 | 30.00 | 0.15 | 0.28 | 22.80 | 34.01 |
| 0.5 | 16.98 | 42.50 | 6.30 | 0.20 | 0.43 | 51.00 | 1.31 | 8.50 | 84.59 | 14.10 | 37.53 | 19.33 | 24.00 | 700.00 | 156.00 | 0.80 | 0.30 | 45.72 | 16.4 |
| 1.5 | 17.20 | 49.74 | 5.68 | 1.02 | 0.27 | 43.36 | 4.31 | 9.61 | 80.92 | 14.67 | 39.60 | 21.60 | 23.60 | 675.00 | 52.70 | 2.00 | 0.30 | 12.96 | 5.55 |
| 5 | 19.45 | 59.39 | 8.57 | 0.93 | 0.27 | 32.30 | 20.69 | 6.40 | 77.40 | 15.26 | 39.25 | 20.97 | 23.60 | 852.00 | 120.00 | 1.98 | 0.26 | 60.64 | 59 |
| 1.25 | 18.20 | 54.84 | 5.50 | 0.44 | 0.12 | 39.10 | 1.95 | 8.60 | 74.23 | 23.82 | 39.60 | 21.60 | 23.60 | 770.00 | 40.00 | 1.33 | 0.19 | 55.50 | 8.4 |
| 1.5 | 18.45 | 49.33 | 6.06 | 0.04 | 0.48 | 44.57 | 0.55 | 9.40 | 81.02 | 18.43 | 39.60 | 21.60 | 23.60 | 900.00 | 20.00 | 0.11 | 0.30 | 33.67 | 28 |
| 10 | 11.53 | 46.40 | 5.70 | 0.20 | 1.61 | 47.70 | 1.10 | 27.00 | 88.90 | 10.00 | 39.25 | 20.97 | 23.60 | 705.00 | 96.50 | 0.75 | 0.36 | 60.75 | 16.6 |
| 2.5 | 16.24 | 48.32 | 7.45 | 1.28 | 0.06 | 43.07 | 0.91 | 9.28 | 84.85 | 14.22 | 39.60 | 21.60 | 23.60 | 800.00 | 102.00 | 1.21 | 0.20 | 49.90 | 17.5 |
| 5.4 | 33.40 | 73.49 | 11.01 | 0.93 | 0.11 | 15.43 | 6.74 | 0.60 | 77.40 | 15.26 | 39.25 | 20.97 | 23.60 | 869.00 | 100.00 | 1.98 | 0.22 | 66.30 | 71.45 |
| 2.4 | 14.64 | 50.00 | 5.70 | 0.20 | 0.03 | 44.10 | 0.85 | 23.50 | 82.00 | 16.50 | 39.60 | 21.60 | 23.60 | 800.00 | 300.00 | 1.21 | 0.32 | 61.30 | 18.6 |
| 1.5 | 18.45 | 49.33 | 6.06 | 0.04 | 0.48 | 44.57 | 0.55 | 9.40 | 81.02 | 18.43 | 39.60 | 21.60 | 23.60 | 900.00 | 20.00 | 1.22 | 0.30 | 33.67 | 56 |
| 2.5 | 16.24 | 48.32 | 7.45 | 1.28 | 0.06 | 43.07 | 0.91 | 9.28 | 84.85 | 14.22 | 39.60 | 21.60 | 23.60 | 800.00 | 102.00 | 1.21 | 0.40 | 52.00 | 73.85 |
| 10 | 16.22 | 55.35 | 6.53 | 0.26 | 0.91 | 36.95 | 2.05 | 21.80 | 84.36 | 13.80 | 39.25 | 20.97 | 23.60 | 770.00 | 96.50 | 0.75 | 0.34 | 59.42 | 5.2 |
| 5.358642343 | 14.83 | 49.07 | 3.79 | 0.63 | 0.09 | 46.42 | 21.68 | 9.95 | 61.68 | 16.65 | 39.60 | 21.60 | 23.60 | 800.00 | 280.58 | 0.50 | 0.35 | 53.30 | 12.78 |
| 1.5 | 14.47 | 46.29 | 6.48 | 1.04 | 0.12 | 46.08 | 1.56 | 11.89 | 75.78 | 14.77 | 37.53 | 19.33 | 24.00 | 820.00 | 156.00 | 1.40 | 0.31 | 46.00 | 30 |
| 6 | 19.30 | 53.50 | 5.70 | 1.00 | 0.48 | 39.80 | 3.51 | 8.90 | 74.86 | 21.62 | 39.60 | 21.60 | 23.60 | 780.00 | 20.00 | 0.44 | 0.09 | 42.11 | 53 |
| 1.25 | 19.30 | 49.20 | 6.12 | 0.10 | 0.01 | 44.58 | 0.40 | 7.00 | 75.15 | 15.03 | 39.60 | 21.60 | 23.60 | 750.00 | 51.00 | 0.54 | 0.24 | 50.22 | 54.22 |
| 25 | 15.23 | 50.11 | 5.90 | 2.88 | 0.30 | 40.88 | 16.98 | 8.73 | 81.52 | 13.10 | 29.60 | 14.00 | 14.00 | 775.00 | 200.00 | 0.75 | 0.30 | 50.60 | 35.5 |
| 22.740675 | 18.10 | 50.84 | 5.82 | 0.88 | 0.43 | 42.46 | 2.62 | 17.60 | 80.84 | 16.54 | 37.53 | 19.33 | 24.00 | 926.85 | 156.00 | 1.28 | 0.26 | 45.07 | 33 |
| 5.883295408 | 14.22 | 47.00 | 6.78 | 0.48 | 0.04 | 45.70 | 20.00 | 9.08 | 66.40 | 13.60 | 39.60 | 21.60 | 23.60 | 828.00 | 280.58 | 0.75 | 0.35 | 64.21 | 47 |
| 5 | 19.99 | 53.31 | 6.91 | 0.84 | 0.52 | 34.30 | 7.12 | 9.34 | 77.52 | 15.36 | 39.60 | 21.60 | 23.60 | 800.00 | 52.70 | 3.08 | 0.30 | 12.67 | 33 |
| 3.5 | 11.50 | 48.75 | 8.57 | 7.32 | 1.61 | 33.75 | 44.00 | 6.95 | 56.00 | 13.93 | 39.25 | 20.97 | 23.60 | 750.00 | 80.00 | 1.88 | 0.30 | 64.90 | 5.73 |
| 1.25 | 19.30 | 49.20 | 6.12 | 0.10 | 0.01 | 44.58 | 0.40 | 7.00 | 75.15 | 15.03 | 39.60 | 21.60 | 23.60 | 700.00 | 45.00 | 0.54 | 0.21 | 50.22 | 20.75 |
| 11 | 19.80 | 50.56 | 5.98 | 0.54 | 0.04 | 42.96 | 1.30 | 7.70 | 80.70 | 13.10 | 38.50 | 17.60 | 26.30 | 667.00 | 275.00 | 0.75 | 0.31 | 59.90 | 6.91 |
| 5 | 20.29 | 51.81 | 5.76 | 0.26 | 0.36 | 41.81 | 5.64 | 8.52 | 79.90 | 14.46 | 39.60 | 21.60 | 23.60 | 900.00 | 52.70 | 0.91 | 0.30 | 50.22 | 5.56 |
| 10 | 13.86 | 50.94 | 6.18 | 0.13 | 0.54 | 42.20 | 1.59 | 24.40 | 86.63 | 11.90 | 39.25 | 20.97 | 23.60 | 810.00 | 96.50 | 0.75 | 0.46 | 61.90 | 28 |
| 12.7 | 18.10 | 47.52 | 6.50 | 0.05 | 0.01 | 46.36 | 0.47 | 8.90 | 81.23 | 18.29 | 39.60 | 21.60 | 23.60 | 800.00 | 30.00 | 0.17 | 0.29 | 8.20 | 58 |
| 4 | 13.96 | 43.52 | 5.72 | 1.20 | 0.66 | 48.90 | 4.88 | 7.80 | 86.05 | 9.07 | 39.25 | 20.97 | 23.60 | 770.00 | 100.00 | 1.98 | 0.28 | 57.50 | 9.9 |
| 0.75 | 18.98 | 50.82 | 7.12 | 0.15 | 0.57 | 41.34 | 0.55 | 8.00 | 82.29 | 17.16 | 39.25 | 20.97 | 23.60 | 800.00 | 100.00 | 1.56 | 0.23 | 56.87 | 19.87 |
| 1.25 | 17.82 | 50.03 | 5.93 | 0.40 | 0.10 | 43.55 | 0.27 | 8.60 | 83.17 | 16.56 | 39.60 | 21.60 | 23.60 | 770.00 | 40.00 | 0.41 | 0.28 | 30.60 | 5.65 |
| 6 | 19.30 | 53.50 | 5.70 | 1.00 | 0.48 | 39.80 | 3.51 | 8.90 | 74.86 | 21.62 | 39.60 | 21.60 | 23.60 | 780.00 | 20.00 | 0.44 | 0.17 | 48.50 | 15.2 |
| 5 | 12.34 | 43.70 | 6.10 | 0.40 | 0.43 | 49.80 | 15.29 | 7.80 | 66.81 | 17.90 | 37.53 | 19.33 | 24.00 | 780.00 | 156.00 | 0.80 | 0.30 | 45.72 | 3.2 |
| 7 | 42.90 | 85.78 | 14.23 | 0.93 | 0.27 | 32.30 | 1.30 | 0.30 | 77.40 | 15.26 | 39.25 | 20.97 | 23.60 | 829.00 | 100.00 | 1.98 | 0.24 | 45.70 | 7.97 |
| 7 | 42.90 | 85.78 | 14.23 | 0.93 | 0.27 | 32.30 | 1.30 | 0.30 | 77.40 | 15.26 | 39.25 | 20.97 | 23.60 | 831.00 | 100.00 | 1.98 | 0.27 | 46.40 | 22.9 |
| 1.25 | 18.20 | 54.84 | 5.50 | 0.44 | 0.12 | 39.10 | 1.95 | 8.60 | 74.23 | 23.82 | 39.60 | 21.60 | 23.60 | 770.00 | 40.00 | 1.33 | 0.37 | 66.50 | 6.08 |
| 10 | 12.15 | 46.40 | 5.70 | 0.20 | 1.61 | 47.70 | 1.10 | 9.50 | 88.90 | 10.00 | 39.25 | 20.97 | 23.60 | 761.00 | 96.50 | 0.75 | 0.38 | 58.28 | 17.06 |
| 2 | 16.06 | 41.80 | 5.30 | 0.20 | 0.43 | 52.70 | 2.36 | 11.10 | 83.69 | 13.95 | 37.53 | 19.33 | 24.00 | 650.00 | 156.00 | 0.80 | 0.30 | 45.72 | 6.8 |
| 1.25 | 19.30 | 49.20 | 6.12 | 0.10 | 0.01 | 44.58 | 0.40 | 7.00 | 75.15 | 15.03 | 39.60 | 21.60 | 23.60 | 800.00 | 54.00 | 0.54 | 0.23 | 50.22 | 14.2 |
| 4 | 13.96 | 43.52 | 5.72 | 1.20 | 0.66 | 48.90 | 4.88 | 7.80 | 86.05 | 9.07 | 39.25 | 20.97 | 23.60 | 770.00 | 100.00 | 1.98 | 0.32 | 58.50 | 13.3 |
| 3.5 | 11.50 | 48.75 | 8.57 | 7.32 | 1.61 | 33.75 | 44.00 | 6.95 | 56.00 | 13.93 | 39.25 | 20.97 | 23.60 | 850.00 | 80.00 | 1.74 | 0.20 | 47.70 | 31.5 |
| 6 | 21.90 | 54.90 | 6.80 | 0.50 | 0.48 | 37.80 | 1.48 | 5.70 | 82.61 | 15.91 | 39.60 | 21.60 | 23.60 | 780.00 | 20.00 | 0.64 | 0.19 | 46.31 | 7 |
| 2.5 | 16.24 | 48.32 | 7.45 | 1.28 | 0.06 | 43.07 | 0.91 | 9.28 | 84.85 | 14.22 | 39.60 | 21.60 | 23.60 | 850.00 | 102.00 | 1.21 | 0.20 | 44.20 | 13.5 |
| 10 | 12.15 | 46.40 | 5.70 | 0.20 | 1.61 | 47.70 | 1.10 | 25.50 | 88.90 | 10.00 | 39.25 | 20.97 | 23.60 | 699.00 | 96.50 | 0.75 | 0.38 | 61.45 | 51.16 |
| 3.5 | 11.50 | 48.75 | 8.57 | 7.32 | 1.61 | 33.75 | 44.00 | 6.95 | 56.00 | 13.93 | 39.25 | 20.97 | 23.60 | 800.00 | 80.00 | 1.74 | 0.20 | 52.20 | 24 |
| 3.5 | 11.50 | 48.75 | 8.57 | 7.32 | 1.61 | 33.75 | 44.00 | 6.95 | 56.00 | 13.93 | 39.25 | 20.97 | 23.60 | 850.00 | 80.00 | 1.00 | 0.30 | 53.10 | 60 |
| 0.5 | 16.98 | 42.50 | 6.30 | 0.20 | 0.43 | 51.00 | 1.31 | 8.50 | 84.59 | 14.10 | 37.53 | 19.33 | 24.00 | 780.00 | 156.00 | 0.80 | 0.30 | 45.72 | 6.7 |
| 3.75 | 15.83 | 43.83 | 5.95 | 0.97 | 0.13 | 45.01 | 5.93 | 6.17 | 75.95 | 13.75 | 39.60 | 21.60 | 23.60 | 965.00 | 102.00 | 1.21 | 0.24 | 52.73 | 9.3 |
| 3.75 | 15.83 | 43.83 | 5.95 | 0.97 | 0.13 | 45.01 | 5.93 | 6.17 | 75.95 | 13.75 | 39.60 | 21.60 | 23.60 | 900.00 | 102.00 | 1.21 | 0.18 | 48.58 | 9.7 |
| 3.5 | 11.50 | 48.75 | 8.57 | 7.32 | 1.61 | 33.75 | 44.00 | 6.95 | 56.00 | 13.93 | 39.25 | 20.97 | 23.60 | 850.00 | 80.00 | 1.88 | 0.30 | 56.50 | 30.6 |
| 11 | 19.80 | 50.56 | 5.98 | 0.54 | 0.04 | 42.96 | 1.30 | 6.90 | 80.70 | 13.10 | 38.50 | 17.60 | 26.30 | 609.00 | 325.00 | 0.75 | 0.53 | 56.70 | 60 |
| 2 | 16.06 | 41.80 | 5.30 | 0.20 | 0.43 | 52.70 | 2.36 | 11.10 | 83.69 | 13.95 | 37.53 | 19.33 | 24.00 | 700.00 | 156.00 | 0.80 | 0.30 | 45.72 | 39 |
| 11 | 20.01 | 50.65 | 5.63 | 0.12 | 0.02 | 43.62 | 0.50 | 6.60 | 82.20 | 13.10 | 40.60 | 29.60 | 26.30 | 594.00 | 255.00 | 0.75 | 0.49 | 56.30 | 51 |
| 0.375 | 18.98 | 50.82 | 7.12 | 0.15 | 0.57 | 41.34 | 0.55 | 8.00 | 82.29 | 17.16 | 39.25 | 20.97 | 23.60 | 800.00 | 100.00 | 2.70 | 0.22 | 56.87 | 16 |
| 5 | 42.90 | 86.03 | 13.97 | 0.93 | 0.27 | 32.30 | 1.00 | 0.20 | 77.40 | 15.26 | 39.25 | 20.97 | 23.60 | 819.00 | 100.00 | 1.98 | 0.20 | 45.10 | 18.06 |
| 1.25 | 19.30 | 49.20 | 6.12 | 0.10 | 0.01 | 44.58 | 0.40 | 7.00 | 75.15 | 15.03 | 39.60 | 21.60 | 23.60 | 750.00 | 50.00 | 0.54 | 0.24 | 50.22 | 52 |
| 5 | 19.45 | 59.39 | 8.57 | 0.93 | 0.27 | 32.30 | 20.69 | 6.40 | 77.40 | 15.26 | 39.25 | 20.97 | 23.60 | 932.00 | 120.00 | 1.98 | 0.33 | 64.61 | 17 |
| 12.7 | 17.50 | 46.56 | 6.24 | 0.14 | 0.02 | 46.13 | 1.95 | 6.25 | 80.12 | 17.93 | 39.60 | 21.60 | 23.60 | 800.00 | 30.00 | 0.00 | 0.20 | 43.34 | 12.73 |
| 0.375 | 18.98 | 50.82 | 7.12 | 0.15 | 0.57 | 41.34 | 0.55 | 8.00 | 82.29 | 17.16 | 39.25 | 20.97 | 23.60 | 800.00 | 100.00 | 2.02 | 0.22 | 56.87 | 11.4 |
| 25 | 15.23 | 50.11 | 5.90 | 2.88 | 0.30 | 40.88 | 16.98 | 8.73 | 81.52 | 13.10 | 29.60 | 14.00 | 14.00 | 775.00 | 200.00 | 0.75 | 0.25 | 54.14 | 17 |
| 6.011764706 | 14.22 | 47.00 | 6.78 | 0.48 | 0.04 | 45.70 | 20.00 | 9.08 | 66.40 | 13.60 | 39.60 | 21.60 | 23.60 | 665.00 | 280.58 | 0.75 | 0.25 | 56.57 | 7.9 |
| 5.4 | 18.60 | 51.30 | 5.81 | 0.20 | 0.43 | 42.60 | 0.43 | 8.00 | 84.13 | 15.43 | 43.50 | 19.50 | 24.00 | 700.00 | 23.00 | 0.90 | 0.30 | 45.72 | 9.2 |
| 5 | 19.99 | 53.31 | 6.91 | 0.84 | 0.52 | 34.30 | 7.12 | 9.34 | 77.52 | 15.36 | 39.60 | 21.60 | 23.60 | 750.00 | 52.70 | 1.23 | 0.30 | 12.67 | 11.6 |
| 0.375 | 18.98 | 50.82 | 7.12 | 0.15 | 0.57 | 41.34 | 0.55 | 8.00 | 82.29 | 17.16 | 39.25 | 20.97 | 23.60 | 800.00 | 100.00 | 2.70 | 0.22 | 56.87 | 55.2 |
| 11 | 19.67 | 49.85 | 6.05 | 0.22 | 0.02 | 43.90 | 0.90 | 10.00 | 83.90 | 13.10 | 46.20 | 24.40 | 24.50 | 620.00 | 297.00 | 0.75 | 0.48 | 60.80 | 32 |
| 5 | 19.99 | 53.31 | 6.91 | 0.84 | 0.52 | 34.30 | 7.12 | 9.34 | 77.52 | 15.36 | 39.60 | 21.60 | 23.60 | 800.00 | 52.70 | 2.08 | 0.30 | 12.67 | 13.51 |
| 3.5 | 11.50 | 48.75 | 8.57 | 7.32 | 1.61 | 33.75 | 44.00 | 6.95 | 56.00 | 13.93 | 39.25 | 20.97 | 23.60 | 850.00 | 80.00 | 1.88 | 0.30 | 55.10 | 8.8 |
| 2.5 | 16.24 | 48.32 | 7.45 | 1.28 | 0.06 | 43.07 | 0.91 | 9.28 | 84.85 | 14.22 | 39.60 | 21.60 | 23.60 | 800.00 | 102.00 | 1.21 | 0.50 | 55.40 | 9.5 |
| 3.5 | 11.50 | 48.75 | 8.57 | 7.32 | 1.61 | 33.75 | 44.00 | 6.95 | 56.00 | 13.93 | 39.25 | 20.97 | 23.60 | 750.00 | 80.00 | 1.00 | 0.30 | 60.40 | 29.1 |
| 5 | 19.99 | 53.31 | 6.91 | 0.84 | 0.52 | 34.30 | 7.12 | 9.34 | 77.52 | 15.36 | 39.60 | 21.60 | 23.60 | 700.00 | 52.70 | 1.23 | 0.30 | 12.67 | 49 |
| 5.684972539 | 14.22 | 47.00 | 6.78 | 0.48 | 0.04 | 45.70 | 20.00 | 9.08 | 66.40 | 13.60 | 39.60 | 21.60 | 23.60 | 750.00 | 280.58 | 0.75 | 0.30 | 62.42 | 52.7 |
| 1.75 | 18.54 | 50.26 | 6.72 | 0.16 | 0.43 | 42.66 | 0.36 | 5.01 | 81.81 | 17.83 | 43.50 | 19.50 | 24.00 | 800.00 | 40.00 | 1.00 | 0.30 | 45.72 | 32 |
| 1.25 | 19.30 | 49.20 | 6.12 | 0.10 | 0.01 | 44.58 | 0.40 | 7.00 | 75.15 | 15.03 | 39.60 | 21.60 | 23.60 | 700.00 | 60.00 | 0.54 | 0.21 | 50.22 | 24.2 |
| 3.5 | 11.50 | 48.75 | 8.57 | 7.32 | 1.61 | 33.75 | 44.00 | 6.95 | 56.00 | 13.93 | 39.25 | 20.97 | 23.60 | 750.00 | 80.00 | 1.74 | 0.40 | 74.90 | 42.4 |
| 6 | 18.50 | 49.40 | 5.90 | 0.10 | 0.48 | 44.50 | 0.33 | 8.50 | 80.98 | 18.69 | 39.60 | 21.60 | 23.60 | 780.00 | 20.00 | 0.65 | 0.29 | 42.44 | 7.5 |
| 0.375 | 18.98 | 50.82 | 7.12 | 0.15 | 0.57 | 41.34 | 0.55 | 8.00 | 82.29 | 17.16 | 39.25 | 20.97 | 23.60 | 800.00 | 100.00 | 1.56 | 0.21 | 56.87 | 12.91 |
| 11 | 18.90 | 49.59 | 6.09 | 0.20 | 0.02 | 44.12 | 1.40 | 7.40 | 82.90 | 13.10 | 38.10 | 26.10 | 25.90 | 647.00 | 282.00 | 0.75 | 0.52 | 58.00 | 6.3 |
| 3.5 | 11.50 | 48.75 | 8.57 | 7.32 | 1.61 | 33.75 | 44.00 | 6.95 | 56.00 | 13.93 | 39.25 | 20.97 | 23.60 | 800.00 | 80.00 | 1.00 | 0.30 | 56.10 | 8.1 |
| 1.25 | 19.30 | 49.20 | 6.12 | 0.10 | 0.01 | 44.58 | 0.40 | 7.00 | 75.15 | 15.03 | 39.60 | 21.60 | 23.60 | 700.00 | 75.00 | 0.54 | 0.21 | 50.22 | 7.25 |
| 2.4 | 14.70 | 50.00 | 5.70 | 0.20 | 0.03 | 44.10 | 0.85 | 23.00 | 82.00 | 16.50 | 39.60 | 21.60 | 23.60 | 810.00 | 162.00 | 1.21 | 0.47 | 66.50 | 38.62 |
| 1.5 | 14.47 | 46.29 | 6.48 | 1.04 | 0.12 | 46.08 | 1.56 | 11.89 | 75.78 | 14.77 | 37.53 | 19.33 | 24.00 | 720.00 | 156.00 | 1.20 | 0.31 | 45.88 | 30.8 |
| 7 | 42.90 | 85.78 | 14.23 | 0.93 | 0.27 | 32.30 | 1.30 | 0.30 | 77.40 | 15.26 | 39.25 | 20.97 | 23.60 | 818.00 | 100.00 | 1.98 | 0.23 | 46.20 | 9.6 |
| 2.5 | 16.24 | 48.32 | 7.45 | 1.28 | 0.06 | 43.07 | 0.91 | 9.28 | 84.85 | 14.22 | 39.60 | 21.60 | 23.60 | 950.00 | 102.00 | 1.21 | 0.20 | 35.10 | 4.2 |
| 5.25 | 12.30 | 40.80 | 5.50 | 0.30 | 0.43 | 53.40 | 15.11 | 10.00 | 67.44 | 17.44 | 37.53 | 19.33 | 24.00 | 700.00 | 156.00 | 0.80 | 0.30 | 45.72 | 6.6 |
| 3.75 | 15.83 | 43.83 | 5.95 | 0.97 | 0.13 | 45.01 | 5.93 | 6.17 | 75.95 | 13.75 | 39.60 | 21.60 | 23.60 | 1025.00 | 102.00 | 1.21 | 0.41 | 59.71 | 51.5 |
| 12.7 | 18.10 | 47.52 | 6.50 | 0.05 | 0.01 | 46.36 | 0.47 | 8.90 | 81.23 | 18.29 | 39.60 | 21.60 | 23.60 | 800.00 | 30.00 | 0.17 | 0.29 | 19.91 | 22 |
| 5 | 19.99 | 53.31 | 6.91 | 0.84 | 0.52 | 34.30 | 7.12 | 9.34 | 77.52 | 15.36 | 39.60 | 21.60 | 23.60 | 800.00 | 52.70 | 1.23 | 0.30 | 12.67 | 60 |
| 1.5 | 18.45 | 49.33 | 6.06 | 0.04 | 0.48 | 44.57 | 0.55 | 9.40 | 81.02 | 18.43 | 39.60 | 21.60 | 23.60 | 900.00 | 20.00 | 2.33 | 0.30 | 33.67 | 14.7 |
| 6 | 18.50 | 49.40 | 5.90 | 0.10 | 0.48 | 44.50 | 0.33 | 8.50 | 80.98 | 18.69 | 39.60 | 21.60 | 23.60 | 780.00 | 20.00 | 0.63 | 0.17 | 38.51 | 22.08 |
| 5 | 19.45 | 59.39 | 8.57 | 0.93 | 0.27 | 32.30 | 20.69 | 6.40 | 77.40 | 15.26 | 39.25 | 20.97 | 23.60 | 849.00 | 120.00 | 1.98 | 0.26 | 61.77 | 12 |
| 1.5 | 14.47 | 46.29 | 6.48 | 1.04 | 0.12 | 46.08 | 1.56 | 11.89 | 75.78 | 14.77 | 37.53 | 19.33 | 24.00 | 870.00 | 156.00 | 1.20 | 0.31 | 50.49 | 8 |
| 1.5 | 17.20 | 49.74 | 5.68 | 1.02 | 0.27 | 43.36 | 4.31 | 9.61 | 80.92 | 14.67 | 39.60 | 21.60 | 23.60 | 675.00 | 52.70 | 2.00 | 0.30 | 12.74 | 32.5 |
| 1.5 | 14.47 | 46.29 | 6.48 | 1.04 | 0.12 | 46.08 | 1.56 | 11.89 | 75.78 | 14.77 | 37.53 | 19.33 | 24.00 | 820.00 | 156.00 | 1.00 | 0.31 | 46.00 | 38 |
| 1.75 | 18.54 | 50.26 | 6.72 | 0.16 | 0.43 | 42.66 | 0.36 | 5.01 | 81.81 | 17.83 | 43.50 | 19.50 | 24.00 | 900.00 | 40.00 | 1.00 | 0.30 | 45.72 | 16.5 |
| 6 | 18.50 | 49.40 | 5.90 | 0.10 | 0.48 | 44.50 | 0.33 | 8.50 | 80.98 | 18.69 | 39.60 | 21.60 | 23.60 | 780.00 | 20.00 | 0.00 | 0.30 | 52.85 | 55 |
| 0.375 | 18.98 | 50.82 | 7.12 | 0.15 | 0.57 | 41.34 | 0.55 | 8.00 | 82.29 | 17.16 | 39.25 | 20.97 | 23.60 | 800.00 | 100.00 | 1.56 | 0.25 | 56.87 | 41.5 |
| 5 | 19.45 | 59.39 | 8.57 | 0.93 | 0.27 | 32.30 | 20.69 | 6.40 | 77.40 | 15.26 | 39.25 | 20.97 | 23.60 | 898.00 | 120.00 | 1.98 | 0.32 | 60.66 | 28 |
| 5 | 19.45 | 59.39 | 8.57 | 0.93 | 0.27 | 32.30 | 20.69 | 6.40 | 77.40 | 15.26 | 39.25 | 20.97 | 23.60 | 869.00 | 120.00 | 1.98 | 0.27 | 61.67 | 16 |
| 1.25 | 19.30 | 49.20 | 6.12 | 0.10 | 0.01 | 44.58 | 0.40 | 7.00 | 75.15 | 15.03 | 39.60 | 21.60 | 23.60 | 700.00 | 75.00 | 0.54 | 0.21 | 50.22 | 71.5 |
| 11 | 18.90 | 49.59 | 6.09 | 0.20 | 0.02 | 44.12 | 1.40 | 6.70 | 82.90 | 13.10 | 38.10 | 26.10 | 25.90 | 600.00 | 250.00 | 0.75 | 0.57 | 55.00 | 53 |
| 3.5 | 11.50 | 48.75 | 8.57 | 7.32 | 1.61 | 33.75 | 44.00 | 6.95 | 56.00 | 13.93 | 39.25 | 20.97 | 23.60 | 750.00 | 80.00 | 1.74 | 0.20 | 60.90 | 19.5 |
| 4 | 13.96 | 43.52 | 5.72 | 1.20 | 0.66 | 48.90 | 4.88 | 7.80 | 86.05 | 9.07 | 39.25 | 20.97 | 23.60 | 950.00 | 100.00 | 1.98 | 0.25 | 51.75 | 5.6 |
| 1.5 | 14.47 | 46.29 | 6.48 | 1.04 | 0.12 | 46.08 | 1.56 | 11.89 | 75.78 | 14.77 | 37.53 | 19.33 | 24.00 | 820.00 | 156.00 | 2.00 | 0.31 | 50.41 | 17.56 |
| 6 | 18.50 | 49.40 | 5.90 | 0.10 | 0.48 | 44.50 | 0.33 | 8.50 | 80.98 | 18.69 | 39.60 | 21.60 | 23.60 | 780.00 | 20.00 | 0.63 | 0.30 | 53.03 | 5.57 |
| 11 | 20.01 | 50.65 | 5.63 | 0.12 | 0.02 | 43.62 | 0.50 | 8.60 | 82.20 | 13.10 | 40.60 | 29.60 | 26.30 | 684.00 | 366.00 | 0.75 | 0.49 | 57.70 | 19.27 |
| 15 | 16.28 | 48.30 | 5.50 | 0.60 | 0.43 | 38.10 | 7.50 | 9.00 | 71.00 | 21.50 | 43.50 | 19.50 | 24.00 | 850.00 | 6.00 | 0.60 | 0.30 | 45.72 | 18.2 |
| 15 | 17.42 | 50.62 | 6.07 | 0.31 | 0.16 | 42.83 | 2.20 | 8.17 | 86.27 | 11.53 | 37.53 | 19.33 | 24.00 | 820.00 | 18.60 | 1.21 | 0.67 | 51.94 | 6.12 |
| 0.53 | 18.98 | 50.82 | 7.12 | 0.15 | 0.57 | 41.34 | 0.55 | 8.00 | 82.29 | 17.16 | 39.25 | 20.97 | 23.60 | 800.00 | 100.00 | 1.56 | 0.23 | 56.87 | 56 |
| 4 | 15.73 | 44.96 | 5.83 | 3.10 | 0.61 | 45.50 | 0.47 | 14.60 | 89.11 | 10.42 | 39.25 | 20.97 | 23.60 | 750.00 | 100.00 | 1.98 | 0.25 | 59.75 | 4 |
| 15 | 16.28 | 48.30 | 5.50 | 0.60 | 0.43 | 38.10 | 7.50 | 9.00 | 71.00 | 21.50 | 43.50 | 19.50 | 24.00 | 850.00 | 6.00 | 1.00 | 0.30 | 45.72 | 15 |
| 27.588675 | 17.30 | 47.60 | 6.10 | 0.52 | 0.43 | 45.78 | 2.12 | 10.10 | 80.06 | 17.82 | 37.53 | 19.33 | 24.00 | 926.85 | 156.00 | 1.28 | 0.29 | 46.59 | 6.12 |
| 5.658478247 | 14.83 | 49.07 | 3.79 | 0.63 | 0.09 | 46.42 | 21.68 | 9.95 | 61.68 | 16.65 | 39.60 | 21.60 | 23.60 | 850.00 | 280.58 | 0.80 | 0.35 | 49.40 | 5 |
| 1.5 | 18.45 | 49.33 | 6.06 | 0.04 | 0.48 | 44.57 | 0.55 | 9.40 | 81.02 | 18.43 | 39.60 | 21.60 | 23.60 | 800.00 | 20.00 | 1.22 | 0.30 | 33.67 | 51.5 |
| 1.25 | 18.20 | 54.84 | 5.50 | 0.44 | 0.12 | 39.10 | 1.95 | 8.60 | 74.23 | 23.82 | 39.60 | 21.60 | 23.60 | 770.00 | 40.00 | 1.09 | 0.28 | 52.93 | 9.8 |
| 5.4 | 33.40 | 73.49 | 11.01 | 0.93 | 0.11 | 15.43 | 6.74 | 0.60 | 77.40 | 15.26 | 39.25 | 20.97 | 23.60 | 884.00 | 100.00 | 1.98 | 0.25 | 64.20 | 40.47 |
| 3.15 | 15.60 | 49.44 | 6.25 | 0.54 | 0.43 | 43.77 | 16.60 | 12.50 | 67.95 | 15.45 | 37.53 | 19.33 | 24.00 | 926.85 | 156.00 | 1.28 | 0.41 | 66.54 | 14 |
| 1.25 | 18.20 | 54.84 | 5.50 | 0.44 | 0.12 | 39.10 | 1.95 | 8.60 | 74.23 | 23.82 | 39.60 | 21.60 | 23.60 | 770.00 | 40.00 | 0.97 | 0.28 | 52.93 | 41 |
| 5 | 42.90 | 86.03 | 13.97 | 0.93 | 0.27 | 32.30 | 1.00 | 0.20 | 77.40 | 15.26 | 39.25 | 20.97 | 23.60 | 898.00 | 100.00 | 1.98 | 0.31 | 68.00 | 3.1 |
| 1.25 | 19.30 | 49.20 | 6.12 | 0.10 | 0.01 | 44.58 | 0.40 | 7.00 | 75.15 | 15.03 | 39.60 | 21.60 | 23.60 | 750.00 | 50.00 | 0.54 | 0.24 | 50.22 | 21.54 |
| 0.375 | 18.98 | 50.82 | 7.12 | 0.15 | 0.57 | 41.34 | 0.55 | 8.00 | 82.29 | 17.16 | 39.25 | 20.97 | 23.60 | 750.00 | 100.00 | 2.70 | 0.22 | 56.87 | 52 |
| 10 | 16.19 | 55.35 | 6.53 | 0.26 | 0.91 | 36.95 | 2.05 | 21.80 | 84.36 | 13.80 | 39.25 | 20.97 | 23.60 | 745.00 | 96.50 | 0.75 | 0.30 | 59.28 | 15.83 |
| 3.5 | 11.50 | 48.75 | 8.57 | 7.32 | 1.61 | 33.75 | 44.00 | 6.95 | 56.00 | 13.93 | 39.25 | 20.97 | 23.60 | 800.00 | 80.00 | 1.88 | 0.30 | 59.80 | 9.5 |
| 5.25 | 12.30 | 40.80 | 5.50 | 0.30 | 0.43 | 53.40 | 15.11 | 10.00 | 67.44 | 17.44 | 37.53 | 19.33 | 24.00 | 750.00 | 156.00 | 0.80 | 0.30 | 45.72 | 14.5 |
| 5.580500318 | 21.65 | 48.39 | 5.86 | 2.04 | 0.43 | 39.21 | 4.50 | 5.00 | 80.30 | 15.20 | 37.53 | 19.33 | 24.00 | 850.00 | 156.00 | 1.28 | 0.30 | 51.50 | 9.6 |
| 3.5 | 11.50 | 48.75 | 8.57 | 7.32 | 1.61 | 33.75 | 44.00 | 6.95 | 56.00 | 13.93 | 39.25 | 20.97 | 23.60 | 800.00 | 80.00 | 0.50 | 0.30 | 58.20 | 54.22 |
| 1.25 | 19.30 | 49.20 | 6.12 | 0.10 | 0.01 | 44.58 | 0.40 | 7.00 | 75.15 | 15.03 | 39.60 | 21.60 | 23.60 | 800.00 | 30.00 | 0.54 | 0.22 | 50.22 | 22.53 |
| 3.594265238 | 14.22 | 47.00 | 6.78 | 0.48 | 0.04 | 45.70 | 20.00 | 9.08 | 66.40 | 13.60 | 39.60 | 21.60 | 23.60 | 766.00 | 280.58 | 0.75 | 0.30 | 63.98 | 15 |
| 6 | 18.50 | 49.40 | 5.90 | 0.10 | 0.48 | 44.50 | 0.33 | 8.50 | 80.98 | 18.69 | 39.60 | 21.60 | 23.60 | 780.00 | 20.00 | 0.65 | 0.17 | 50.50 | 7.9 |
| 0.5 | 16.98 | 42.50 | 6.30 | 0.20 | 0.43 | 51.00 | 1.31 | 8.50 | 84.59 | 14.10 | 37.53 | 19.33 | 24.00 | 750.00 | 156.00 | 0.80 | 0.30 | 45.72 | 7.11 |
| 1.5 | 14.47 | 46.29 | 6.48 | 1.04 | 0.12 | 46.08 | 1.56 | 11.89 | 75.78 | 14.77 | 37.53 | 19.33 | 24.00 | 820.00 | 156.00 | 1.20 | 0.31 | 45.88 | 12.9 |
| 5.580500318 | 20.18 | 45.85 | 5.80 | 1.60 | 0.43 | 40.25 | 4.60 | 5.00 | 80.00 | 15.40 | 37.53 | 19.33 | 24.00 | 850.00 | 156.00 | 1.28 | 0.30 | 49.10 | 57.5 |
| 2 | 27.30 | 69.61 | 10.17 | 0.61 | 0.74 | 19.24 | 16.51 | 1.90 | 77.40 | 15.26 | 39.25 | 20.97 | 23.60 | 896.00 | 100.00 | 1.98 | 0.28 | 62.30 | 10 |
| 5.580500318 | 19.53 | 45.10 | 6.00 | 1.70 | 0.43 | 41.50 | 5.60 | 5.00 | 81.75 | 12.65 | 37.53 | 19.33 | 24.00 | 850.00 | 156.00 | 1.28 | 0.30 | 51.50 | 6 |
| 15 | 16.28 | 48.30 | 5.50 | 0.60 | 0.43 | 38.10 | 7.50 | 9.00 | 71.00 | 21.50 | 43.50 | 19.50 | 24.00 | 850.00 | 6.00 | 0.70 | 0.30 | 45.72 | 32.5 |
| 5.4 | 18.60 | 51.30 | 5.81 | 0.20 | 0.43 | 42.60 | 0.43 | 8.00 | 84.13 | 15.43 | 43.50 | 19.50 | 24.00 | 800.00 | 23.00 | 0.90 | 0.30 | 45.72 | 21.87 |
| 4 | 15.73 | 44.96 | 5.83 | 3.10 | 0.61 | 45.50 | 0.47 | 14.60 | 89.11 | 10.42 | 39.25 | 20.97 | 23.60 | 950.00 | 100.00 | 1.98 | 0.25 | 50.00 | 53.5 |
| 30 | 17.42 | 50.62 | 6.07 | 0.31 | 0.16 | 42.83 | 2.20 | 8.17 | 86.27 | 11.53 | 37.53 | 19.33 | 24.00 | 930.00 | 20.30 | 1.21 | 0.73 | 53.08 | 3.77 |
| 2.4 | 14.81 | 50.00 | 5.70 | 0.20 | 0.03 | 44.10 | 0.85 | 22.00 | 82.00 | 16.50 | 39.60 | 21.60 | 23.60 | 800.00 | 240.00 | 1.21 | 0.26 | 58.30 | 8.24 |
| 5.25 | 12.30 | 40.80 | 5.50 | 0.30 | 0.43 | 53.40 | 15.11 | 10.00 | 67.44 | 17.44 | 37.53 | 19.33 | 24.00 | 650.00 | 156.00 | 0.80 | 0.30 | 45.72 | 13.1 |
| 70 | 17.42 | 50.62 | 6.07 | 0.31 | 0.16 | 42.83 | 2.20 | 8.17 | 86.27 | 11.53 | 37.53 | 19.33 | 24.00 | 1000.00 | 24.80 | 1.21 | 0.87 | 56.29 | 28.5 |
| 3.5 | 11.50 | 48.75 | 8.57 | 7.32 | 1.61 | 33.75 | 44.00 | 6.95 | 56.00 | 13.93 | 39.25 | 20.97 | 23.60 | 750.00 | 80.00 | 1.88 | 0.30 | 64.40 | 57.5 |
| 10 | 13.84 | 50.94 | 6.18 | 0.13 | 0.54 | 42.20 | 1.59 | 24.40 | 86.63 | 11.90 | 39.25 | 20.97 | 23.60 | 725.00 | 96.50 | 0.75 | 0.30 | 58.20 | 18 |
| 5.580500318 | 16.60 | 45.10 | 6.00 | 1.70 | 0.43 | 41.50 | 5.60 | 20.00 | 81.75 | 12.65 | 37.53 | 19.33 | 24.00 | 850.00 | 156.00 | 1.28 | 0.30 | 50.50 | 12.1 |
| 6.568647184 | 14.83 | 49.07 | 3.79 | 0.63 | 0.09 | 46.42 | 21.68 | 9.95 | 61.68 | 16.65 | 39.60 | 21.60 | 23.60 | 800.00 | 280.58 | 0.50 | 0.40 | 54.50 | 22.49 |
| 5 | 19.45 | 59.39 | 8.57 | 0.93 | 0.27 | 32.30 | 20.69 | 6.40 | 77.40 | 15.26 | 39.25 | 20.97 | 23.60 | 879.00 | 120.00 | 1.98 | 0.30 | 61.86 | 5.49 |
| 5 | 20.29 | 51.81 | 5.76 | 0.26 | 0.36 | 41.81 | 5.64 | 8.52 | 79.90 | 14.46 | 39.60 | 21.60 | 23.60 | 700.00 | 52.70 | 1.16 | 0.30 | 50.22 | 64 |
| 1.25 | 19.30 | 49.20 | 6.12 | 0.10 | 0.01 | 44.58 | 0.40 | 7.00 | 75.15 | 15.03 | 39.60 | 21.60 | 23.60 | 800.00 | 40.00 | 0.54 | 0.23 | 50.22 | 8 |
| 10 | 13.86 | 50.94 | 6.18 | 0.13 | 0.54 | 42.20 | 1.59 | 24.40 | 86.63 | 11.90 | 39.25 | 20.97 | 23.60 | 785.00 | 96.50 | 0.75 | 0.43 | 60.31 | 54 |
| 1.25 | 19.30 | 49.20 | 6.12 | 0.10 | 0.01 | 44.58 | 0.40 | 7.00 | 75.15 | 15.03 | 39.60 | 21.60 | 23.60 | 800.00 | 45.00 | 0.54 | 0.23 | 50.22 | 9.2 |
| 1.25 | 19.30 | 49.20 | 6.12 | 0.10 | 0.01 | 44.58 | 0.40 | 7.00 | 75.15 | 15.03 | 39.60 | 21.60 | 23.60 | 750.00 | 55.00 | 0.54 | 0.24 | 50.22 | 12.58 |
| 0.5 | 16.98 | 42.50 | 6.30 | 0.20 | 0.43 | 51.00 | 1.31 | 8.50 | 84.59 | 14.10 | 37.53 | 19.33 | 24.00 | 650.00 | 156.00 | 0.80 | 0.30 | 45.72 | 30.5 |
| 6 | 21.90 | 54.90 | 6.80 | 0.50 | 0.48 | 37.80 | 1.48 | 5.70 | 82.61 | 15.91 | 39.60 | 21.60 | 23.60 | 780.00 | 20.00 | 0.60 | 0.12 | 32.08 | 22.5 |
| 5.4 | 40.20 | 81.63 | 13.45 | 0.21 | 0.10 | 4.62 | 1.91 | 0.70 | 77.40 | 15.26 | 39.25 | 20.97 | 23.60 | 894.00 | 100.00 | 1.98 | 0.27 | 65.60 | 31.5 |
| 5.580500318 | 18.40 | 48.39 | 5.86 | 2.04 | 0.43 | 39.21 | 4.50 | 20.00 | 80.30 | 15.20 | 37.53 | 19.33 | 24.00 | 850.00 | 156.00 | 1.28 | 0.30 | 50.50 | 22.91 |
| 1.25 | 17.82 | 50.03 | 5.93 | 0.40 | 0.10 | 43.55 | 0.27 | 8.60 | 83.17 | 16.56 | 39.60 | 21.60 | 23.60 | 770.00 | 40.00 | 1.33 | 0.19 | 54.80 | 28.2 |
| 1.5 | 14.47 | 46.29 | 6.48 | 1.04 | 0.12 | 46.08 | 1.56 | 11.89 | 75.78 | 14.77 | 37.53 | 19.33 | 24.00 | 770.00 | 156.00 | 1.20 | 0.31 | 45.88 | 9.8 |
| 5 | 42.90 | 86.03 | 13.97 | 0.93 | 0.27 | 32.30 | 1.00 | 0.20 | 77.40 | 15.26 | 39.25 | 20.97 | 23.60 | 825.00 | 100.00 | 1.98 | 0.21 | 44.40 | 20.27 |
| 0.375 | 18.98 | 50.82 | 7.12 | 0.15 | 0.57 | 41.34 | 0.55 | 8.00 | 82.29 | 17.16 | 39.25 | 20.97 | 23.60 | 700.00 | 100.00 | 2.70 | 0.22 | 56.87 | 12.1 |
| 5.673987347 | 15.62 | 40.07 | 7.10 | 1.40 | 0.17 | 50.50 | 1.65 | 15.01 | 78.16 | 20.18 | 39.60 | 21.60 | 23.60 | 800.00 | 30.00 | 0.17 | 0.34 | 11.37 | 51.5 |
| 1.25 | 17.82 | 50.03 | 5.93 | 0.40 | 0.10 | 43.55 | 0.27 | 8.60 | 83.17 | 16.56 | 39.60 | 21.60 | 23.60 | 770.00 | 40.00 | 1.33 | 0.31 | 61.40 | 7.68 |
| 6 | 21.90 | 54.90 | 6.80 | 0.50 | 0.48 | 37.80 | 1.48 | 5.70 | 82.61 | 15.91 | 39.60 | 21.60 | 23.60 | 780.00 | 20.00 | 1.22 | 0.23 | 44.50 | 12 |
| 5 | 42.90 | 86.03 | 13.97 | 0.93 | 0.27 | 32.30 | 1.00 | 0.20 | 77.40 | 15.26 | 39.25 | 20.97 | 23.60 | 825.00 | 100.00 | 1.98 | 0.31 | 50.30 | 50.5 |
| 2 | 27.30 | 69.61 | 10.17 | 0.61 | 0.74 | 19.24 | 16.51 | 1.90 | 77.40 | 15.26 | 39.25 | 20.97 | 23.60 | 869.00 | 100.00 | 1.98 | 0.23 | 57.90 | 8.48 |
| 1.25 | 19.30 | 49.20 | 6.12 | 0.10 | 0.01 | 44.58 | 0.40 | 7.00 | 75.15 | 15.03 | 39.60 | 21.60 | 23.60 | 800.00 | 45.00 | 0.54 | 0.23 | 50.22 | 9.5 |
| 5.580500318 | 17.15 | 45.85 | 5.80 | 1.60 | 0.43 | 40.25 | 4.60 | 20.00 | 80.00 | 15.40 | 37.53 | 19.33 | 24.00 | 850.00 | 156.00 | 1.28 | 0.30 | 48.90 | 32 |
| 7.306535484 | 14.22 | 47.00 | 6.78 | 0.48 | 0.04 | 45.70 | 20.00 | 9.08 | 66.40 | 13.60 | 39.60 | 21.60 | 23.60 | 700.00 | 280.58 | 0.75 | 0.25 | 63.13 | 6.8 |
| 5.580500318 | 18.76 | 44.85 | 5.98 | 1.65 | 0.43 | 41.84 | 5.80 | 5.00 | 82.00 | 12.20 | 37.53 | 19.33 | 24.00 | 850.00 | 156.00 | 1.28 | 0.30 | 53.00 | 40.92 |
| 25 | 15.23 | 50.11 | 5.90 | 2.88 | 0.30 | 40.88 | 16.98 | 8.73 | 81.52 | 13.10 | 29.60 | 14.00 | 14.00 | 775.00 | 200.00 | 0.75 | 0.30 | 54.45 | 46 |
| 1.5 | 25.40 | 61.13 | 8.73 | 0.57 | 0.11 | 29.83 | 6.23 | 5.60 | 77.40 | 15.26 | 39.25 | 20.97 | 23.60 | 915.00 | 100.00 | 1.98 | 0.31 | 60.70 | 3.78 |
| 1.25 | 17.82 | 50.03 | 5.93 | 0.40 | 0.10 | 43.55 | 0.27 | 8.60 | 83.17 | 16.56 | 39.60 | 21.60 | 23.60 | 770.00 | 40.00 | 0.96 | 0.28 | 5.30 | 9.5 |
| 4.487953514 | 15.62 | 40.07 | 7.10 | 1.40 | 0.17 | 50.50 | 1.65 | 15.01 | 78.16 | 20.18 | 39.60 | 21.60 | 23.60 | 800.00 | 30.00 | 0.00 | 0.22 | 53.10 | 5.78 |
| 5 | 20.29 | 51.81 | 5.76 | 0.26 | 0.36 | 41.81 | 5.64 | 8.52 | 79.90 | 14.46 | 39.60 | 21.60 | 23.60 | 900.00 | 52.70 | 0.25 | 0.30 | 50.22 | 32 |
| 11 | 20.27 | 51.06 | 6.04 | 0.14 | 0.01 | 42.70 | 0.70 | 11.00 | 82.60 | 13.10 | 44.50 | 20.60 | 27.80 | 553.00 | 241.00 | 0.75 | 0.43 | 60.90 | 8.5 |
| 4.84557605 | 14.83 | 49.07 | 3.79 | 0.63 | 0.09 | 46.42 | 21.68 | 9.95 | 61.68 | 16.65 | 39.60 | 21.60 | 23.60 | 800.00 | 280.58 | 0.80 | 0.35 | 51.90 | 51.5 |
| 5 | 20.29 | 51.81 | 5.76 | 0.26 | 0.36 | 41.81 | 5.64 | 8.52 | 79.90 | 14.46 | 39.60 | 21.60 | 23.60 | 850.00 | 52.70 | 1.16 | 0.30 | 50.22 | 7.6 |
| 5 | 42.90 | 86.03 | 13.97 | 0.93 | 0.27 | 32.30 | 1.00 | 0.20 | 77.40 | 15.26 | 39.25 | 20.97 | 23.60 | 867.00 | 100.00 | 1.98 | 0.22 | 64.70 | 10.4 |
| 1.25 | 18.20 | 54.84 | 5.50 | 0.44 | 0.12 | 39.10 | 1.95 | 8.60 | 74.23 | 23.82 | 39.60 | 21.60 | 23.60 | 770.00 | 40.00 | 0.63 | 0.28 | 52.93 | 21 |
| 5.4 | 40.20 | 81.63 | 13.45 | 0.21 | 0.10 | 4.62 | 1.91 | 0.70 | 77.40 | 15.26 | 39.25 | 20.97 | 23.60 | 890.00 | 100.00 | 1.98 | 0.24 | 61.00 | 16.35 |
| 12.7 | 18.10 | 47.52 | 6.50 | 0.05 | 0.01 | 46.36 | 0.47 | 8.90 | 81.23 | 18.29 | 39.60 | 21.60 | 23.60 | 800.00 | 30.00 | 0.00 | 0.19 | 43.74 | 10.3 |
| 1.25 | 19.30 | 49.20 | 6.12 | 0.10 | 0.01 | 44.58 | 0.40 | 7.00 | 75.15 | 15.03 | 39.60 | 21.60 | 23.60 | 700.00 | 68.00 | 0.54 | 0.21 | 50.22 | 10.89 |
| 2.5 | 16.24 | 48.32 | 7.45 | 1.28 | 0.06 | 43.07 | 0.91 | 9.28 | 84.85 | 14.22 | 39.60 | 21.60 | 23.60 | 800.00 | 102.00 | 1.21 | 0.10 | 52.50 | 14.2 |
| 1.25 | 19.30 | 49.20 | 6.12 | 0.10 | 0.01 | 44.58 | 0.40 | 7.00 | 75.15 | 15.03 | 39.60 | 21.60 | 23.60 | 700.00 | 55.00 | 0.54 | 0.21 | 50.22 | 60 |
| 3.5 | 11.50 | 48.75 | 8.57 | 7.32 | 1.61 | 33.75 | 44.00 | 6.95 | 56.00 | 13.93 | 39.25 | 20.97 | 23.60 | 750.00 | 80.00 | 1.74 | 0.30 | 65.10 | 5.37 |
| 6.380220254 | 15.62 | 40.07 | 7.10 | 1.40 | 0.17 | 50.50 | 1.65 | 15.01 | 78.16 | 20.18 | 39.60 | 21.60 | 23.60 | 800.00 | 30.00 | 0.17 | 0.34 | 27.71 | 17 |
| 11 | 18.90 | 49.59 | 6.09 | 0.20 | 0.02 | 44.12 | 1.40 | 6.70 | 82.90 | 13.10 | 38.10 | 26.10 | 25.90 | 575.00 | 347.00 | 0.75 | 0.52 | 63.77 | 44 |
| 5.051899175 | 14.22 | 47.00 | 6.78 | 0.48 | 0.04 | 45.70 | 20.00 | 9.08 | 66.40 | 13.60 | 39.60 | 21.60 | 23.60 | 811.00 | 280.58 | 0.75 | 0.35 | 63.59 | 3.26 |
| 0.375 | 18.98 | 50.82 | 7.12 | 0.15 | 0.57 | 41.34 | 0.55 | 8.00 | 82.29 | 17.16 | 39.25 | 20.97 | 23.60 | 850.00 | 100.00 | 2.70 | 0.22 | 56.87 | 5.44 |
| 6 | 18.50 | 49.40 | 5.90 | 0.10 | 0.48 | 44.50 | 0.33 | 8.50 | 80.98 | 18.69 | 39.60 | 21.60 | 23.60 | 780.00 | 20.00 | 0.65 | 0.29 | 51.44 | 52.5 |
| 10 | 11.53 | 46.40 | 5.70 | 0.20 | 1.61 | 47.70 | 1.10 | 27.00 | 88.90 | 10.00 | 39.25 | 20.97 | 23.60 | 730.00 | 96.50 | 0.75 | 0.39 | 61.38 | 56 |
| 1.25 | 18.20 | 54.84 | 5.50 | 0.44 | 0.12 | 39.10 | 1.95 | 8.60 | 74.23 | 23.82 | 39.60 | 21.60 | 23.60 | 770.00 | 40.00 | 1.33 | 0.31 | 63.80 | 59 |
| 6 | 18.50 | 49.40 | 5.90 | 0.10 | 0.48 | 44.50 | 0.33 | 8.50 | 80.98 | 18.69 | 39.60 | 21.60 | 23.60 | 780.00 | 20.00 | 0.65 | 0.17 | 42.04 | 8.23 |
| 4 | 13.96 | 43.52 | 5.72 | 1.20 | 0.66 | 48.90 | 4.88 | 7.80 | 86.05 | 9.07 | 39.25 | 20.97 | 23.60 | 850.00 | 100.00 | 1.98 | 0.25 | 53.00 | 20.2 |
| 6.127138934 | 14.83 | 49.07 | 3.79 | 0.63 | 0.09 | 46.42 | 21.68 | 9.95 | 61.68 | 16.65 | 39.60 | 21.60 | 23.60 | 850.00 | 280.58 | 0.50 | 0.35 | 51.80 | 7.6 |
| 5 | 42.90 | 86.03 | 13.97 | 0.93 | 0.27 | 32.30 | 1.00 | 0.20 | 77.40 | 15.26 | 39.25 | 20.97 | 23.60 | 807.00 | 100.00 | 1.98 | 0.27 | 49.00 | 13 |
| 4 | 15.73 | 44.96 | 5.83 | 3.10 | 0.61 | 45.50 | 0.47 | 14.60 | 89.11 | 10.42 | 39.25 | 20.97 | 23.60 | 850.00 | 100.00 | 1.98 | 0.25 | 55.25 | 3.39 |
| 27.588675 | 17.30 | 47.60 | 6.10 | 0.52 | 0.43 | 45.78 | 2.12 | 10.10 | 80.06 | 17.82 | 37.53 | 19.33 | 24.00 | 926.85 | 156.00 | 1.28 | 0.28 | 46.46 | 6.5 |
| 10 | 16.22 | 55.35 | 6.53 | 0.26 | 0.91 | 36.95 | 2.05 | 21.80 | 84.36 | 13.80 | 39.25 | 20.97 | 23.60 | 825.00 | 96.50 | 0.75 | 0.45 | 61.60 | 37 |
| 10 | 11.53 | 46.40 | 5.70 | 0.20 | 1.61 | 47.70 | 1.10 | 27.00 | 88.90 | 10.00 | 39.25 | 20.97 | 23.60 | 770.00 | 96.50 | 0.75 | 0.49 | 63.00 | 8.44 |
| 5 | 42.90 | 86.03 | 13.97 | 0.93 | 0.27 | 32.30 | 1.00 | 0.20 | 77.40 | 15.26 | 39.25 | 20.97 | 23.60 | 856.00 | 100.00 | 1.98 | 0.30 | 56.20 | 32.5 |
| 3.5 | 11.50 | 48.75 | 8.57 | 7.32 | 1.61 | 33.75 | 44.00 | 6.95 | 56.00 | 13.93 | 39.25 | 20.97 | 23.60 | 850.00 | 80.00 | 1.74 | 0.30 | 57.70 | 40.4 |
| 6.426146668 | 14.83 | 49.07 | 3.79 | 0.63 | 0.09 | 46.42 | 21.68 | 9.95 | 61.68 | 16.65 | 39.60 | 21.60 | 23.60 | 800.00 | 280.58 | 0.20 | 0.35 | 57.30 | 18.93 |
| 11 | 19.67 | 49.85 | 6.05 | 0.22 | 0.02 | 43.90 | 0.90 | 10.50 | 83.90 | 13.10 | 46.20 | 24.40 | 24.50 | 668.00 | 275.00 | 0.75 | 0.43 | 54.10 | 11 |
| 6.315171142 | 14.22 | 47.00 | 6.78 | 0.48 | 0.04 | 45.70 | 20.00 | 9.08 | 66.40 | 13.60 | 39.60 | 21.60 | 23.60 | 670.00 | 280.58 | 0.75 | 0.25 | 59.46 | 71.47 |
| 5.25 | 12.30 | 40.80 | 5.50 | 0.30 | 0.43 | 53.40 | 15.11 | 10.00 | 67.44 | 17.44 | 37.53 | 19.33 | 24.00 | 780.00 | 156.00 | 0.80 | 0.30 | 45.72 | 13.7 |
| 0.375 | 18.98 | 50.82 | 7.12 | 0.15 | 0.57 | 41.34 | 0.55 | 8.00 | 82.29 | 17.16 | 39.25 | 20.97 | 23.60 | 900.00 | 100.00 | 2.70 | 0.22 | 56.87 | 17.5 |
| 1.5 | 25.40 | 61.13 | 8.73 | 0.57 | 0.11 | 29.83 | 6.23 | 5.60 | 77.40 | 15.26 | 39.25 | 20.97 | 23.60 | 879.00 | 100.00 | 1.98 | 0.26 | 55.80 | 32.25 |
| 3.75 | 15.83 | 43.83 | 5.95 | 0.97 | 0.13 | 45.01 | 5.93 | 6.17 | 75.95 | 13.75 | 39.60 | 21.60 | 23.60 | 950.00 | 102.00 | 1.21 | 0.21 | 51.15 | 21.93 |
| 3 | 18.45 | 49.33 | 6.06 | 0.04 | 0.48 | 44.57 | 0.55 | 9.40 | 81.02 | 18.43 | 39.60 | 21.60 | 23.60 | 850.00 | 20.00 | 1.22 | 0.30 | 33.67 | 39.4 |
| 12.7 | 17.50 | 46.56 | 6.24 | 0.14 | 0.02 | 46.13 | 1.95 | 6.25 | 80.12 | 17.93 | 39.60 | 21.60 | 23.60 | 800.00 | 30.00 | 0.18 | 0.31 | 7.16 | 12.1 |
| 2.4 | 15.19 | 50.00 | 5.70 | 0.20 | 0.03 | 44.10 | 0.85 | 19.00 | 82.00 | 16.50 | 39.60 | 21.60 | 23.60 | 800.00 | 312.00 | 1.21 | 0.32 | 45.00 | 30.1 |
| 1.5 | 14.47 | 46.29 | 6.48 | 1.04 | 0.12 | 46.08 | 1.56 | 11.89 | 75.78 | 14.77 | 37.53 | 19.33 | 24.00 | 820.00 | 156.00 | 1.20 | 0.31 | 46.00 | 12 |
| 0.25 | 18.98 | 50.82 | 7.12 | 0.15 | 0.57 | 41.34 | 0.55 | 8.00 | 82.29 | 17.16 | 39.25 | 20.97 | 23.60 | 800.00 | 100.00 | 1.56 | 0.23 | 56.87 | 17.5 |
| 5 | 20.29 | 51.81 | 5.76 | 0.26 | 0.36 | 41.81 | 5.64 | 8.52 | 79.90 | 14.46 | 39.60 | 21.60 | 23.60 | 900.00 | 52.70 | 0.40 | 0.30 | 50.22 | 5.9 |
| 10 | 12.15 | 46.40 | 5.70 | 0.20 | 1.61 | 47.70 | 1.10 | 18.10 | 88.90 | 10.00 | 39.25 | 20.97 | 23.60 | 730.00 | 96.50 | 0.75 | 0.38 | 59.92 | 23.15 |
| 5 | 42.90 | 86.03 | 13.97 | 0.93 | 0.27 | 32.30 | 1.00 | 0.20 | 77.40 | 15.26 | 39.25 | 20.97 | 23.60 | 845.00 | 100.00 | 1.98 | 0.20 | 64.10 | 13.75 |
| 2 | 16.06 | 41.80 | 5.30 | 0.20 | 0.43 | 52.70 | 2.36 | 11.10 | 83.69 | 13.95 | 37.53 | 19.33 | 24.00 | 780.00 | 156.00 | 0.80 | 0.30 | 45.72 | 38 |
| 2.4 | 14.46 | 50.00 | 5.70 | 0.20 | 0.03 | 44.10 | 0.85 | 25.00 | 82.00 | 16.50 | 39.60 | 21.60 | 23.60 | 790.00 | 300.00 | 1.21 | 0.36 | 58.30 | 5.3 |
| 11 | 20.27 | 51.06 | 6.04 | 0.14 | 0.01 | 42.70 | 0.70 | 6.30 | 82.60 | 13.10 | 44.50 | 20.60 | 27.80 | 565.00 | 250.00 | 0.75 | 0.49 | 61.40 | 52.2 |
| 3.75 | 15.83 | 43.83 | 5.95 | 0.97 | 0.13 | 45.01 | 5.93 | 6.17 | 75.95 | 13.75 | 39.60 | 21.60 | 23.60 | 985.00 | 102.00 | 1.21 | 0.32 | 55.67 | 53 |
| 1.5 | 14.47 | 46.29 | 6.48 | 1.04 | 0.12 | 46.08 | 1.56 | 11.89 | 75.78 | 14.77 | 37.53 | 19.33 | 24.00 | 820.00 | 156.00 | 0.80 | 0.31 | 46.00 | 5.32 |
| 10 | 16.22 | 55.35 | 6.53 | 0.26 | 0.91 | 36.95 | 2.05 | 21.80 | 84.36 | 13.80 | 39.25 | 20.97 | 23.60 | 775.00 | 96.50 | 0.75 | 0.38 | 60.47 | 51 |
| 3.5 | 11.50 | 48.75 | 8.57 | 7.32 | 1.61 | 33.75 | 44.00 | 6.95 | 56.00 | 13.93 | 39.25 | 20.97 | 23.60 | 800.00 | 80.00 | 1.00 | 0.30 | 58.50 | 32.25 |
| 4 | 13.96 | 43.52 | 5.72 | 1.20 | 0.66 | 48.90 | 4.88 | 7.80 | 86.05 | 9.07 | 39.25 | 20.97 | 23.60 | 770.00 | 100.00 | 1.98 | 0.17 | 55.75 | 16.1 |
| 2.4 | 14.94 | 50.00 | 5.70 | 0.20 | 0.03 | 44.10 | 0.85 | 21.00 | 82.00 | 16.50 | 39.60 | 21.60 | 23.60 | 800.00 | 300.00 | 1.21 | 0.37 | 58.30 | 14 |
| 11 | 20.01 | 50.65 | 5.63 | 0.12 | 0.02 | 43.62 | 0.50 | 8.30 | 82.20 | 13.10 | 40.60 | 29.60 | 26.30 | 625.00 | 336.00 | 0.75 | 0.50 | 59.20 | 23.5 |
| 3.5 | 11.50 | 48.75 | 8.57 | 7.32 | 1.61 | 33.75 | 44.00 | 6.95 | 56.00 | 13.93 | 39.25 | 20.97 | 23.60 | 800.00 | 80.00 | 1.74 | 0.40 | 65.30 | 36.5 |
| 6 | 21.90 | 54.90 | 6.80 | 0.50 | 0.48 | 37.80 | 1.48 | 5.70 | 82.61 | 15.91 | 39.60 | 21.60 | 23.60 | 780.00 | 20.00 | 1.22 | 0.19 | 48.50 | 28.5 |
| 2 | 16.06 | 41.80 | 5.30 | 0.20 | 0.43 | 52.70 | 2.36 | 11.10 | 83.69 | 13.95 | 37.53 | 19.33 | 24.00 | 750.00 | 156.00 | 0.80 | 0.30 | 45.72 | 10.58 |
| 7 | 42.90 | 85.78 | 14.23 | 0.93 | 0.27 | 32.30 | 1.30 | 0.30 | 77.40 | 15.26 | 39.25 | 20.97 | 23.60 | 879.00 | 100.00 | 1.98 | 0.29 | 54.80 | 8.4 |
| 5 | 20.29 | 51.81 | 5.76 | 0.26 | 0.36 | 41.81 | 5.64 | 8.52 | 79.90 | 14.46 | 39.60 | 21.60 | 23.60 | 800.00 | 52.70 | 1.16 | 0.30 | 50.22 | 48 |
| 5 | 12.34 | 43.70 | 6.10 | 0.40 | 0.43 | 49.80 | 15.29 | 7.80 | 66.81 | 17.90 | 37.53 | 19.33 | 24.00 | 700.00 | 156.00 | 0.80 | 0.30 | 45.72 | 9 |
| 1.25 | 19.30 | 49.20 | 6.12 | 0.10 | 0.01 | 44.58 | 0.40 | 7.00 | 75.15 | 15.03 | 39.60 | 21.60 | 23.60 | 750.00 | 40.00 | 0.54 | 0.25 | 50.22 | 9.2 |
| 3.75 | 15.83 | 43.83 | 5.95 | 0.97 | 0.13 | 45.01 | 5.93 | 6.17 | 75.95 | 13.75 | 39.60 | 21.60 | 23.60 | 975.00 | 102.00 | 1.21 | 0.28 | 53.49 | 5.47 |
| 2.5 | 16.24 | 48.32 | 7.45 | 1.28 | 0.06 | 43.07 | 0.91 | 9.28 | 84.85 | 14.22 | 39.60 | 21.60 | 23.60 | 800.00 | 102.00 | 1.21 | 0.30 | 50.80 | 18.2 |
| 24.0204 | 18.40 | 48.91 | 5.80 | 0.18 | 0.43 | 45.11 | 2.10 | 9.50 | 80.63 | 17.27 | 37.53 | 19.33 | 24.00 | 926.85 | 156.00 | 1.28 | 0.27 | 47.25 | 6.47 |
| 5 | 42.90 | 86.03 | 13.97 | 0.93 | 0.27 | 32.30 | 1.00 | 0.20 | 77.40 | 15.26 | 39.25 | 20.97 | 23.60 | 816.00 | 100.00 | 1.98 | 0.28 | 48.50 | 7.25 |
| 5 | 19.99 | 53.31 | 6.91 | 0.84 | 0.52 | 34.30 | 7.12 | 9.34 | 77.52 | 15.36 | 39.60 | 21.60 | 23.60 | 800.00 | 52.70 | 0.73 | 0.30 | 12.67 | 19.5 |
| 3.75 | 15.83 | 43.83 | 5.95 | 0.97 | 0.13 | 45.01 | 5.93 | 6.17 | 75.95 | 13.75 | 39.60 | 21.60 | 23.60 | 995.00 | 102.00 | 1.21 | 0.36 | 56.88 | 10.92 |
| 0.65 | 18.45 | 49.33 | 6.06 | 0.04 | 0.48 | 44.57 | 0.55 | 9.40 | 81.02 | 18.43 | 39.60 | 21.60 | 23.60 | 850.00 | 20.00 | 1.22 | 0.30 | 33.67 | 9.9 |
| 3.5 | 11.50 | 48.75 | 8.57 | 7.32 | 1.61 | 33.75 | 44.00 | 6.95 | 56.00 | 13.93 | 39.25 | 20.97 | 23.60 | 800.00 | 80.00 | 1.74 | 0.30 | 60.80 | 26.9 |
| 4 | 15.73 | 44.96 | 5.83 | 3.10 | 0.61 | 45.50 | 0.47 | 14.60 | 89.11 | 10.42 | 39.25 | 20.97 | 23.60 | 650.00 | 100.00 | 1.98 | 0.25 | 61.00 | 7.08 |
| 4 | 13.96 | 43.52 | 5.72 | 1.20 | 0.66 | 48.90 | 4.88 | 7.80 | 86.05 | 9.07 | 39.25 | 20.97 | 23.60 | 650.00 | 100.00 | 1.98 | 0.25 | 62.00 | 22.98 |
| 1.25 | 19.30 | 49.20 | 6.12 | 0.10 | 0.01 | 44.58 | 0.40 | 7.00 | 75.15 | 15.03 | 39.60 | 21.60 | 23.60 | 800.00 | 61.00 | 0.54 | 0.22 | 50.22 | 3.2 |
| 1.25 | 17.82 | 50.03 | 5.93 | 0.40 | 0.10 | 43.55 | 0.27 | 8.60 | 83.17 | 16.56 | 39.60 | 21.60 | 23.60 | 770.00 | 40.00 | 1.33 | 0.37 | 64.60 | 16 |
| 1.25 | 18.20 | 54.84 | 5.50 | 0.44 | 0.12 | 39.10 | 1.95 | 8.60 | 74.23 | 23.82 | 39.60 | 21.60 | 23.60 | 770.00 | 40.00 | 0.41 | 0.28 | 23.30 | 6.5 |
| 1.75 | 18.54 | 50.26 | 6.72 | 0.16 | 0.43 | 42.66 | 0.36 | 5.01 | 81.81 | 17.83 | 43.50 | 19.50 | 24.00 | 700.00 | 40.00 | 1.00 | 0.30 | 45.72 | 32.5 |
| 5 | 19.99 | 53.31 | 6.91 | 0.84 | 0.52 | 34.30 | 7.12 | 9.34 | 77.52 | 15.36 | 39.60 | 21.60 | 23.60 | 800.00 | 52.70 | 2.77 | 0.30 | 12.67 | 12.26 |
| 5 | 19.99 | 53.31 | 6.91 | 0.84 | 0.52 | 34.30 | 7.12 | 9.34 | 77.52 | 15.36 | 39.60 | 21.60 | 23.60 | 800.00 | 52.70 | 0.00 | 0.30 | 12.67 | 11.9 |
| 1.5 | 18.45 | 49.33 | 6.06 | 0.04 | 0.48 | 44.57 | 0.55 | 9.40 | 81.02 | 18.43 | 39.60 | 21.60 | 23.60 | 850.00 | 20.00 | 1.22 | 0.30 | 33.67 | 8 |
| 4 | 13.96 | 43.52 | 5.72 | 1.20 | 0.66 | 48.90 | 4.88 | 7.80 | 86.05 | 9.07 | 39.25 | 20.97 | 23.60 | 1050.00 | 100.00 | 1.98 | 0.25 | 50.75 | 8 |
| 5.202313785 | 14.83 | 49.07 | 3.79 | 0.63 | 0.09 | 46.42 | 21.68 | 9.95 | 61.68 | 16.65 | 39.60 | 21.60 | 23.60 | 800.00 | 280.58 | 0.50 | 0.30 | 52.50 | 11.8 |
| 2.5 | 16.24 | 48.32 | 7.45 | 1.28 | 0.06 | 43.07 | 0.91 | 9.28 | 84.85 | 14.22 | 39.60 | 21.60 | 23.60 | 900.00 | 102.00 | 1.21 | 0.20 | 39.00 | 48.5 |
| 10 | 17.42 | 50.62 | 6.07 | 0.31 | 0.16 | 42.83 | 2.20 | 8.17 | 86.27 | 11.53 | 37.53 | 19.33 | 24.00 | 790.00 | 16.30 | 1.21 | 0.58 | 51.69 | 25 |
| 5 | 19.99 | 53.31 | 6.91 | 0.84 | 0.52 | 34.30 | 7.12 | 9.34 | 77.52 | 15.36 | 39.60 | 21.60 | 23.60 | 800.00 | 52.70 | 1.23 | 0.30 | 12.67 | 3.25 |
| 3.5 | 11.50 | 48.75 | 8.57 | 7.32 | 1.61 | 33.75 | 44.00 | 6.95 | 56.00 | 13.93 | 39.25 | 20.97 | 23.60 | 750.00 | 80.00 | 0.50 | 0.30 | 60.80 | 32.25 |
| 1.5 | 17.20 | 49.74 | 5.68 | 1.02 | 0.27 | 43.36 | 4.31 | 9.61 | 80.92 | 14.67 | 39.60 | 21.60 | 23.60 | 675.00 | 52.70 | 2.00 | 0.30 | 11.69 | 4 |
| 0.4275 | 17.20 | 49.74 | 5.68 | 1.02 | 0.27 | 43.36 | 4.31 | 9.61 | 80.92 | 14.67 | 39.60 | 21.60 | 23.60 | 676.00 | 52.70 | 2.00 | 0.30 | 13.28 | 3.4 |
| 5 | 42.90 | 86.03 | 13.97 | 0.93 | 0.27 | 32.30 | 1.00 | 0.20 | 77.40 | 15.26 | 39.25 | 20.97 | 23.60 | 850.00 | 100.00 | 1.98 | 0.29 | 47.20 | 20 |
| 4 | 13.96 | 43.52 | 5.72 | 1.20 | 0.66 | 48.90 | 4.88 | 7.80 | 86.05 | 9.07 | 39.25 | 20.97 | 23.60 | 770.00 | 100.00 | 1.98 | 0.21 | 54.28 | 19 |
| 0.38 | 18.98 | 50.82 | 7.12 | 0.15 | 0.57 | 41.34 | 0.55 | 8.00 | 82.29 | 17.16 | 39.25 | 20.97 | 23.60 | 800.00 | 100.00 | 1.56 | 0.23 | 56.87 | 10.9 |
| 6 | 19.30 | 53.50 | 5.70 | 1.00 | 0.48 | 39.80 | 3.51 | 8.90 | 74.86 | 21.62 | 39.60 | 21.60 | 23.60 | 780.00 | 20.00 | 1.22 | 0.17 | 43.17 | 53.94 |
| 1.75 | 18.54 | 50.26 | 6.72 | 0.16 | 0.43 | 42.66 | 0.36 | 5.01 | 81.81 | 17.83 | 43.50 | 19.50 | 24.00 | 900.00 | 40.00 | 0.50 | 0.30 | 45.72 | 33 |
| 5 | 20.29 | 51.81 | 5.76 | 0.26 | 0.36 | 41.81 | 5.64 | 8.52 | 79.90 | 14.46 | 39.60 | 21.60 | 23.60 | 900.00 | 52.70 | 1.16 | 0.30 | 50.22 | 12.3 |
| 5 | 20.29 | 51.81 | 5.76 | 0.26 | 0.36 | 41.81 | 5.64 | 8.52 | 79.90 | 14.46 | 39.60 | 21.60 | 23.60 | 900.00 | 52.70 | 1.16 | 0.30 | 50.22 | 9.1 |
| 6 | 19.30 | 53.50 | 5.70 | 1.00 | 0.48 | 39.80 | 3.51 | 8.90 | 74.86 | 21.62 | 39.60 | 21.60 | 23.60 | 780.00 | 20.00 | 0.44 | 0.09 | 54.00 | 9.5 |
| 10 | 11.53 | 46.40 | 5.70 | 0.20 | 1.61 | 47.70 | 1.10 | 27.00 | 88.90 | 10.00 | 39.25 | 20.97 | 23.60 | 740.00 | 96.50 | 0.75 | 0.42 | 62.25 | 32 |
| 5 | 19.99 | 53.31 | 6.91 | 0.84 | 0.52 | 34.30 | 7.12 | 9.34 | 77.52 | 15.36 | 39.60 | 21.60 | 23.60 | 800.00 | 52.70 | 1.23 | 0.30 | 12.67 | 17 |
| 2 | 27.30 | 69.61 | 10.17 | 0.61 | 0.74 | 19.24 | 16.51 | 1.90 | 77.40 | 15.26 | 39.25 | 20.97 | 23.60 | 899.00 | 100.00 | 1.98 | 0.34 | 64.70 | 60 |
| 27.588675 | 17.30 | 47.60 | 6.10 | 0.52 | 0.43 | 45.78 | 2.12 | 10.10 | 80.06 | 17.82 | 37.53 | 19.33 | 24.00 | 926.85 | 156.00 | 1.28 | 0.28 | 45.25 | 22 |
| 1.25 | 18.20 | 54.84 | 5.50 | 0.44 | 0.12 | 39.10 | 1.95 | 8.60 | 74.23 | 23.82 | 39.60 | 21.60 | 23.60 | 770.00 | 40.00 | 1.33 | 0.24 | 58.20 | 17 |
| 0.375 | 18.98 | 50.82 | 7.12 | 0.15 | 0.57 | 41.34 | 0.55 | 8.00 | 82.29 | 17.16 | 39.25 | 20.97 | 23.60 | 800.00 | 100.00 | 4.04 | 0.22 | 56.87 | 16 |
| 1.25 | 17.82 | 50.03 | 5.93 | 0.40 | 0.10 | 43.55 | 0.27 | 8.60 | 83.17 | 16.56 | 39.60 | 21.60 | 23.60 | 770.00 | 40.00 | 0.65 | 0.28 | 10.60 | 19.87 |
| 3.5 | 11.50 | 48.75 | 8.57 | 7.32 | 1.61 | 33.75 | 44.00 | 6.95 | 56.00 | 13.93 | 39.25 | 20.97 | 23.60 | 850.00 | 80.00 | 1.74 | 0.40 | 63.30 | 11.1 |
| 5 | 19.99 | 53.31 | 6.91 | 0.84 | 0.52 | 34.30 | 7.12 | 9.34 | 77.52 | 15.36 | 39.60 | 21.60 | 23.60 | 850.00 | 52.70 | 1.23 | 0.30 | 12.67 | 29.5 |
| 5.4 | 33.40 | 73.49 | 11.01 | 0.93 | 0.11 | 15.43 | 6.74 | 0.60 | 77.40 | 15.26 | 39.25 | 20.97 | 23.60 | 914.00 | 100.00 | 1.98 | 0.31 | 68.50 | 11 |
| 2.5 | 16.24 | 48.32 | 7.45 | 1.28 | 0.06 | 43.07 | 0.91 | 9.28 | 84.85 | 14.22 | 39.60 | 21.60 | 23.60 | 750.00 | 102.00 | 1.21 | 0.20 | 55.00 | 13.02 |
| 11 | 19.80 | 50.56 | 5.98 | 0.54 | 0.04 | 42.96 | 1.30 | 9.80 | 80.70 | 13.10 | 38.50 | 17.60 | 26.30 | 755.00 | 346.00 | 0.75 | 0.52 | 58.70 | 11 |
| 5 | 19.99 | 53.31 | 6.91 | 0.84 | 0.52 | 34.30 | 7.12 | 9.34 | 77.52 | 15.36 | 39.60 | 21.60 | 23.60 | 800.00 | 52.70 | 1.23 | 0.30 | 12.67 | 51 |
| 1.5 | 14.47 | 46.29 | 6.48 | 1.04 | 0.12 | 46.08 | 1.56 | 11.89 | 75.78 | 14.77 | 37.53 | 19.33 | 24.00 | 820.00 | 156.00 | 1.70 | 0.31 | 46.00 | 8.5 |
| 6 | 21.90 | 54.90 | 6.80 | 0.50 | 0.48 | 37.80 | 1.48 | 5.70 | 82.61 | 15.91 | 39.60 | 21.60 | 23.60 | 780.00 | 20.00 | 0.64 | 0.23 | 36.27 | 17.5 |
| 3.15 | 15.60 | 49.44 | 6.25 | 0.54 | 0.43 | 43.77 | 16.60 | 12.50 | 67.95 | 15.45 | 37.53 | 19.33 | 24.00 | 926.85 | 156.00 | 1.28 | 0.38 | 60.50 | 3.32 |
| 5.580500318 | 15.95 | 44.85 | 5.98 | 1.65 | 0.43 | 41.84 | 5.80 | 20.00 | 82.00 | 12.20 | 37.53 | 19.33 | 24.00 | 850.00 | 156.00 | 1.28 | 0.30 | 52.50 | 9 |
| 10 | 16.22 | 55.35 | 6.53 | 0.26 | 0.91 | 36.95 | 2.05 | 21.80 | 84.36 | 13.80 | 39.25 | 20.97 | 23.60 | 790.00 | 96.50 | 0.75 | 0.40 | 60.68 | 25 |
| 5.580500318 | 19.06 | 44.43 | 6.16 | 1.65 | 0.43 | 41.90 | 5.50 | 5.00 | 81.25 | 13.25 | 37.53 | 19.33 | 24.00 | 850.00 | 156.00 | 1.28 | 0.30 | 52.40 | 9.85 |
| 3.5 | 11.50 | 48.75 | 8.57 | 7.32 | 1.61 | 33.75 | 44.00 | 6.95 | 56.00 | 13.93 | 39.25 | 20.97 | 23.60 | 800.00 | 80.00 | 1.88 | 0.30 | 60.10 | 8.6 |
| 5.703246767 | 14.22 | 47.00 | 6.78 | 0.48 | 0.04 | 45.70 | 20.00 | 9.08 | 66.40 | 13.60 | 39.60 | 21.60 | 23.60 | 744.00 | 280.58 | 0.75 | 0.30 | 61.30 | 17.5 |
| 4 | 13.96 | 43.52 | 5.72 | 1.20 | 0.66 | 48.90 | 4.88 | 7.80 | 86.05 | 9.07 | 39.25 | 20.97 | 23.60 | 750.00 | 100.00 | 1.98 | 0.25 | 57.40 | 51.5 |
| 0.375 | 18.98 | 50.82 | 7.12 | 0.15 | 0.57 | 41.34 | 0.55 | 8.00 | 82.29 | 17.16 | 39.25 | 20.97 | 23.60 | 800.00 | 100.00 | 1.56 | 0.23 | 56.87 | 5.83 |
| 1.25 | 17.82 | 50.03 | 5.93 | 0.40 | 0.10 | 43.55 | 0.27 | 8.60 | 83.17 | 16.56 | 39.60 | 21.60 | 23.60 | 770.00 | 40.00 | 1.33 | 0.24 | 57.20 | 19.72 |
| 11 | 19.67 | 49.85 | 6.05 | 0.22 | 0.02 | 43.90 | 0.90 | 9.80 | 83.90 | 13.10 | 46.20 | 24.40 | 24.50 | 711.00 | 403.00 | 0.75 | 0.53 | 57.20 | 3.6 |
| 0.375 | 18.98 | 50.82 | 7.12 | 0.15 | 0.57 | 41.34 | 0.55 | 8.00 | 82.29 | 17.16 | 39.25 | 20.97 | 23.60 | 800.00 | 100.00 | 1.56 | 0.27 | 56.87 | 46.54 |
| 5.4 | 18.60 | 51.30 | 5.81 | 0.20 | 0.43 | 42.60 | 0.43 | 8.00 | 84.13 | 15.43 | 43.50 | 19.50 | 24.00 | 750.00 | 23.00 | 0.90 | 0.30 | 45.72 | 31 |
| 5 | 12.34 | 43.70 | 6.10 | 0.40 | 0.43 | 49.80 | 15.29 | 7.80 | 66.81 | 17.90 | 37.53 | 19.33 | 24.00 | 750.00 | 156.00 | 0.80 | 0.30 | 45.72 | 6 |
| 6 | 18.50 | 49.40 | 5.90 | 0.10 | 0.48 | 44.50 | 0.33 | 8.50 | 80.98 | 18.69 | 39.60 | 21.60 | 23.60 | 780.00 | 20.00 | 0.91 | 0.29 | 50.04 | 30 |
| 3.5 | 11.50 | 48.75 | 8.57 | 7.32 | 1.61 | 33.75 | 44.00 | 6.95 | 56.00 | 13.93 | 39.25 | 20.97 | 23.60 | 850.00 | 80.00 | 0.50 | 0.30 | 53.80 | 12.3 |
| 5 | 12.34 | 43.70 | 6.10 | 0.40 | 0.43 | 49.80 | 15.29 | 7.80 | 66.81 | 17.90 | 37.53 | 19.33 | 24.00 | 650.00 | 156.00 | 0.80 | 0.30 | 45.72 | 4.4 |
| 50 | 17.42 | 50.62 | 6.07 | 0.31 | 0.16 | 42.83 | 2.20 | 8.17 | 86.27 | 11.53 | 37.53 | 19.33 | 24.00 | 1030.00 | 21.70 | 1.21 | 0.77 | 55.72 | 22.18 |
| 0.375 | 18.98 | 50.82 | 7.12 | 0.15 | 0.57 | 41.34 | 0.55 | 8.00 | 82.29 | 17.16 | 39.25 | 20.97 | 23.60 | 800.00 | 100.00 | 1.56 | 0.19 | 56.87 | 10.4 |
| 0.375 | 18.98 | 50.82 | 7.12 | 0.15 | 0.57 | 41.34 | 0.55 | 8.00 | 82.29 | 17.16 | 39.25 | 20.97 | 23.60 | 800.00 | 100.00 | 1.35 | 0.22 | 56.87 | 32 |
